# Supplementary material for: Defect-rich Fe-doped NiS/MoS2 heterostructured ultrathin nanosheets for efficient overall water splitting
Source: Royal Society of Chemistry journal article supplement (doi:10.1039/d1cp05721a), 2022-01-01
Supplement: d1cp05721a1.pdf [file d1cp05721a1.pdf]

## Supporting Information

### Defect-rich Fe doped NiS/MoS<sub>2</sub> heterostructured ultrathin nanosheets for efficient overall water splitting

Peng Liu<sup>a</sup>, Jiawen Li<sup>a</sup>, Jianyue Yan<sup>a</sup>, and Wenbo Song<sup>a,\*</sup>

<sup>a</sup> College of Chemistry, Jilin University, Changchun 130012, P.R. China

\*Corresponding author.

E-mail address: [wbsong@jlu.edu.cn](mailto:wbsong@jlu.edu.cn)

#### Contents:

1. Materials
2. Characterization.
3. Electrode preparation and electrochemical measurement.
4. synthetic method for control samples: Fe-doped NiS and Fe-doped MoS<sub>2</sub>
5. Figure S1. SEM images of 0.05Fe-Ni/Mo MOF and 0.2Fe-Ni/Mo MOF
6. Figure S2. SEM images of NiS/MoS<sub>2</sub>, 0.05Fe-NiS/MoS<sub>2</sub> and 0.2Fe-NiS/MoS<sub>2</sub>
7. Figure S3. CV curves of NiS/MoS<sub>2</sub>, 0.05Fe-NiS/MoS<sub>2</sub> and 0.2Fe-NiS/MoS<sub>2</sub> under different scan rates.
8. Figure S4. HER and OER performance comparison of 0.1Fe-NiS/MoS<sub>2</sub> with Fe-doped NiS and Fe-doped MoS<sub>2</sub>
9. Figure S5. XRD pattern and SEM images of 0.1Fe-NiS/MoS<sub>2</sub> post 1000 cycles OER test.
10. Table S1. The ICP-AES result for samples with different Fe amount.
11. Table S2. HER/OER activity comparison with the recently reported Ni/Mo based sulfides.
12. References.

## 1. Materials

Sodium molybdate dihydrate ( $\text{Na}_2\text{MoO}_4 \cdot 2\text{H}_2\text{O}$ , 99.0%), nickel nitrate hexahydrate [ $\text{Ni}(\text{NO}_3)_2 \cdot 6\text{H}_2\text{O}$ , 99.0%], Ferric nitrate nonahydrate [ $\text{Fe}(\text{NO}_3)_3 \cdot 9\text{H}_2\text{O}$ , 99.0%], Nafion solution (5 wt%), N,N-dimethylformamide (DMF), Potassium hydroxide (KOH, 99.0%) and ethanol were purchased from Sinopharm Chemical Reagent Co. Ltd. 4,4-Bipyridine ( $\text{C}_{10}\text{H}_8\text{N}_2$ , 98%) and Pluronic® F-127 were purchased from Aladdin Industrial Corporation (Shanghai, China). All the reagents used in the experiment were of analytical grade and used without further purification.

## 2. Characterization

X-ray diffraction (XRD, PANalytical B.V. Empyrean Cu K $\alpha$  radiation) was used to identify the crystal structure of prepared samples. Scanning electron microscopy (SEM, HITACHI SU8000) and transmission electron microscopy (TEM, JEOL JEM-2200FS) were utilized to investigate the morphology of samples. X-ray photoelectron spectroscopy (XPS) data were collected using ESCALAB 250 spectrometer with a monochromatic X-ray source with Al K $\alpha$  excitation (1486.6 eV) under ultrahigh vacuum.

## 3. Electrode preparation and electrochemical measurement

Electrochemical measurements were performed with an electrochemical workstation (CHI 760E, CH Instruments Inc.) in 1 mol L<sup>-1</sup> KOH aqueous solution. Saturated Calomel Electrode (SCE) and graphite rod were used as the reference and counter electrode, respectively. Typically, 4 mg of the catalyst powder was dispersed in 1 mL of 50 vol % water and 50 vol % N,N-Dimethylformamide (DMF) mixed solvent, and the mixture was sonicated for 30 min. Then, 10  $\mu\text{L}$  of the above solution was drop-cast onto the surface of a glassy carbon (GC) electrode. All the potential values were converted with respect to a reversible hydrogen electrode (RHE). Polarization curves were acquired under a potential sweep rate of 5 mV s<sup>-1</sup>. Stability tests were performed in a potential range of -0.5 ~ 0 V for HER and 1.2 ~ 1.7 V for OER with a potential sweep rate of 150 mV s<sup>-1</sup> for 1000 cycles. Current-time responses were operated by chronoamperometric measurements for 60000 s. The electrochemical

impedance spectroscopy (EIS) was carried out in the range from 100 KHz to 0.1 Hz with an AC amplitude of 5 mV. All the current density presented here was normalized to the geometrical area ( $0.0707 \text{ cm}^2$ ) of glassy carbon electrode with 95% iR correction.

#### 4. synthetic method for control samples: Fe-doped NiS and Fe-doped MoS<sub>2</sub>

9 mmol Ni(NO<sub>3</sub>)<sub>2</sub>·6H<sub>2</sub>O, 5 mmol 4,4-bipyridine and 1 mmol Fe(NO<sub>3</sub>)<sub>3</sub>·9H<sub>2</sub>O were grinded to form evenly powder denoted as precursor A. 9 mmol Na<sub>2</sub>MoO<sub>4</sub>, 5 mmol 4,4-bipyridine and 1 mmol Fe(NO<sub>3</sub>)<sub>3</sub>·9H<sub>2</sub>O were grinded to form evenly powder denoted as precursor B. Each of the above precursors was transferred into a corundum boat located at the center of a tubular furnace. Another corundum boat containing S powder was then placed in the upstream of precursor. Under a ramp rate of  $3 \text{ }^\circ\text{C min}^{-1}$ , the tubular furnace was heated to  $500 \text{ }^\circ\text{C}$  in N<sub>2</sub> atmosphere, and this temperature was maintained for 1h. The resultant products are denoted as Fe-doped NiS and Fe-doped MoS<sub>2</sub>, respectively.

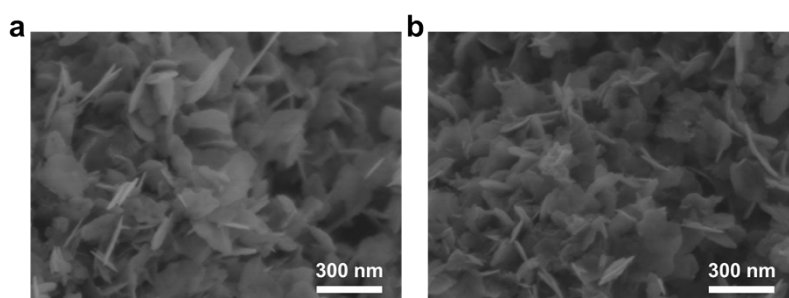

Fig. S1 SEM images of (a) 0.05Fe-Ni/Mo MOF and (b) 0.2Fe-Ni/Mo MOF

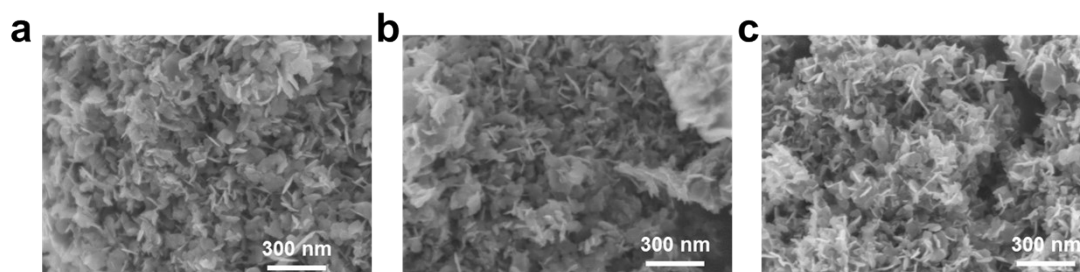

Fig. S2 SEM images of (a) NiS/MoS<sub>2</sub>, (b) 0.05Fe-NiS/MoS<sub>2</sub> and (c) 0.2Fe-NiS/MoS<sub>2</sub>

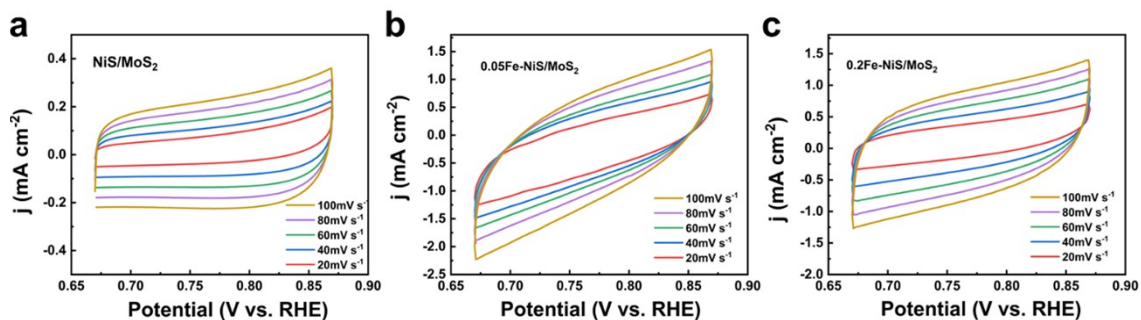

Fig. S3 CV curves of (a) NiS/MoS<sub>2</sub>, (b) 0.05Fe-NiS/MoS<sub>2</sub> and (c) 0.2Fe-NiS/MoS<sub>2</sub> under different scan rates.

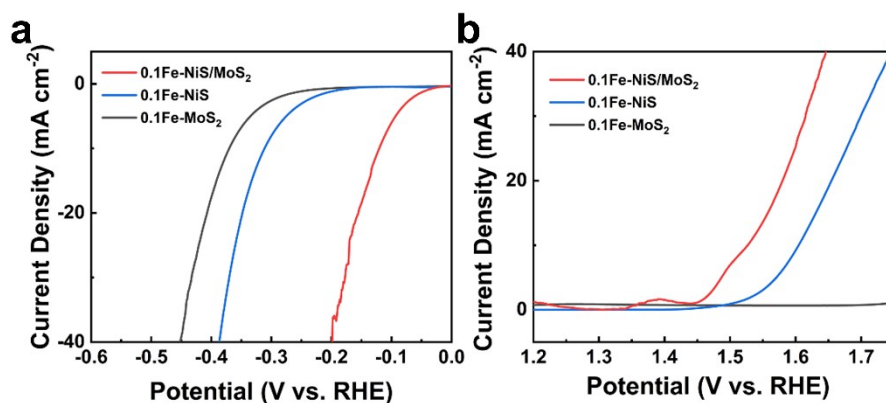

Fig. S4 HER (a) / OER (b) performance comparison of 0.1Fe-NiS/MoS<sub>2</sub> with Fe-doped NiS and Fe-doped MoS<sub>2</sub>

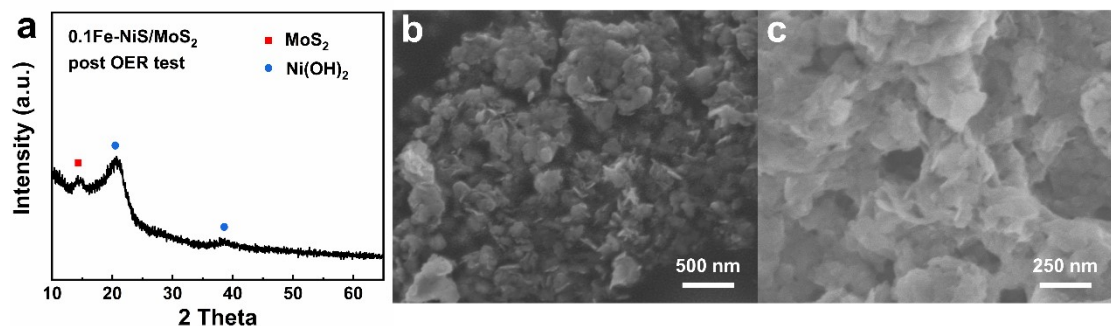

Fig. S5 XRD pattern (a) and SEM images (b, c) of 0.1Fe-NiS/MoS<sub>2</sub> post 1000 cycles OER test.

Table S1. The ICP-AES result for samples with different Fe amount

| elements | 0.05Fe-NiS/MoS <sub>2</sub> | 0.1Fe-NiS/MoS <sub>2</sub> | 0.2Fe-NiS/MoS <sub>2</sub> |
|----------|-----------------------------|----------------------------|----------------------------|
| Fe atom% | 2.01                        | 5.09                       | 10.38                      |
| Ni atom% | 41.26                       | 45.89                      | 39.73                      |
| Mo atom% | 56.73                       | 49.02                      | 49.89                      |

Table S2. HER/OER activity comparison with the recently reported Ni/Mo based sulfides.

| Samples/substrates                                                   | HER $\eta_{10}$<br>(mV) | HER Tafel<br>slope<br>(mV dec <sup>-1</sup> ) | OER $\eta_{10}$<br>(mV) | OER Tafel<br>slope<br>(mV dec <sup>-1</sup> ) | reference |
|----------------------------------------------------------------------|-------------------------|-----------------------------------------------|-------------------------|-----------------------------------------------|-----------|
| NiS/MoS <sub>2</sub> /C (GC)                                         | 117                     | 58                                            | -                       | -                                             | 1         |
| MoS <sub>2</sub> /rGO/NiS (GC)                                       | 169                     | 91.6                                          | -                       | -                                             | 2         |
| MoS <sub>2</sub> ][NiS][MoO <sub>3</sub>                             | 91                      | 54.5                                          | -                       | -                                             | 3         |
| NiS/MoS <sub>2</sub> (CC)                                            | 174                     | 70.2                                          | -                       | -                                             | 4         |
| MoS <sub>2</sub> /NiS (GC)                                           | 244                     | 97                                            | 350                     | 108                                           | 5         |
| Fe/C-doped-<br>MoS <sub>2</sub> /Ni <sub>3</sub> S <sub>2</sub> (GC) | 188                     | 95                                            | 270                     | 66                                            | 6         |
| NiS <sub>2</sub> /MoS <sub>2</sub> (GC)                              | 135                     | 82                                            | 293                     | 102.3                                         | 7         |
| NiS <sub>2</sub> /MoS <sub>2</sub> (CC)                              | 91                      | 57.2                                          | 362 ( $\eta_{50}$ )     | 117.3                                         | 8         |
| 0.1Fe-NiS/MoS <sub>2</sub> (GC)                                      | 120                     | 69.0                                          | 297                     | 54.7                                          | This work |

## References

- 1 K. Tao, Y. Gong and J. Lin, *Electrochim. Acta*, 2018, **274**, 74-83.
- 2 G. Liu, K. Thummavichai, X. Lv, W. Chen, T. Lin, S. Tan, M. Zeng, Y. Chen, N. Wang and Y. Zhu, *Nanomaterials*, 2021, **11**.
- 3 C. Wang, B. Tian, M. Wu and J. Wang, *ACS Appl. Mater. Interfaces*, 2017, **9**, 7084-7090.
- 4 A. Long, W. Li, M. Zhou, W. Gao, B. Liu, J. Wei, X. Zhang, H. Liu, Y. Liu and X. Zeng, *Journal of Materials Chemistry A*, 2019, **7**, 21514-21522.
- 5 Q. Qin, L. Chen, T. Wei and X. Liu, 2019, **15**, 1803639.
- 6 X. Lv, G. Liu, S. Liu, W. Chen, D. Cao, T. Song, N. Wang and Y. Zhu, 2021, **11**, 340.
- 7 Q. Zhang, B. Liu, Y. Ji, L. Chen, L. Zhang, L. Li and C. Wang, *Nanoscale*, 2020, **12**, 2578-2586.
- 8 X. Wang, L. Li, Z. Wang, L. Tan, Z. Wu, Z. Liu, S. Gai and P. Yang, *Electrochimica Acta*, 2019, **326**, 134983.
